# Supplementary material for: Task-Sharing Anaesthesia in Conflict Zones: A Cross-Sectional Study of Safety Gaps and Systemic Failures in Sudan
Source: Research Square preprint supplement (doi:10.21203/rs.3.rs-7051962/v1), 2025-07-18
Supplement: Supplementary file 1 [file e9b287a7f1fbc67e4a2cce76.pdf]

## Structured Interview Guide – Task-Sharing Anaesthesia in Sudan

---

### Section A: Demographic Information

1. Name (optional): \_\_\_\_\_
2. Position / Title: \_\_\_\_\_
3. Years of experience in current role: \_\_\_\_\_

### Section B: Anaesthesia Workforce and Structure

4. How many total anesthesia providers are currently working in your facility?
  - Physicians: \_\_\_\_\_
  - Technologists / non-physician providers: \_\_\_\_\_
5. Do you have a designated head of the anesthesia department?
  - Yes
  - No
  - If yes, is it a physician or technologist? \_\_\_\_\_
6. Are anesthesia technologists supervised directly by physicians during procedures?
  - Always
  - Sometimes
  - Rarely
  - Never
7. What shifts do anesthesia providers typically work (hours per day)? \_\_\_\_\_
8. Do anesthesia providers cover multiple theatres or departments simultaneously?
  - Yes
  - No

### Section C: Safety Practices and Protocols

9. Is there a written protocol or checklist used in the operating theatre?
  - Yes
  - No
  - If yes, which one? \_\_\_\_\_
10. How often is the WHO Surgical Safety Checklist used?
  - Always
  - Sometimes
  - Rarely
  - Never

11. Are adverse events or anesthesia-related complications documented?

- Always
- Sometimes
- Rarely
- Never

12. Are there systems for incident reporting and follow-up?

- Yes
- No

#### **Section D: Capacity and Training**

13. Have anesthesia technologists received any formal continuing education or in-service training in the past year?

- Yes
- No

14. Are there any simulations or practical drills for anesthesia emergencies?

- Yes
- No

15. What challenges do anesthesia staff face most frequently? (You may select more than one)

- Shortage of staff
- Inadequate equipment
- Lack of supervision
- Poor documentation
- No training opportunities
- Other: \_\_\_\_\_

#### **Section E: Perceptions and Recommendations**

15. In your view, what is the impact of task-sharing on patient safety in anesthesia services?

\_\_\_\_\_

16. What are the most urgent needs to improve anesthesia safety in your facility?

\_\_\_\_\_

17. Do you believe non-physician anesthesia providers should have more autonomy, supervision, or training?

\_\_\_\_\_
